# Supplementary material for: Intraspecific Fine-Root Trait-Environment Relationships across Interior Douglas-Fir Forests of Western Canada
Source: PubMed Central journal article supplement (PMC6681360; doi:10.3390/plants8070199), 2019-06-30
Supplement: plants-08-00199-s001.pdf [file plants-08-00199-s001.pdf]

## Supplementary Materials

**Figure S1** Ordination plot **(A)** and **(B)** associated scores of samples across a biogeographic gradient based on principal component analysis of fine root traits of second-order roots **(a)** and third-order roots **(b)** of interior Douglas-fir. C, root carbon concentration (%); N, root nitrogen concentration (%); SRA, specific root area ( $\text{cm}^2\text{g}^{-1}$ ); SRL, specific root length ( $\text{mg}^{-1}$ ); RTD, root tissue density ( $\text{mgcm}^{-3}$ ); BrIntensity, branching intensity ( $\text{cm}^{-1}$ ); DBI, dichotomus branching index. Branching intensity was not included in the ordination plot for third-order roots as it is calculated as the number of first- order root/ length of second- order root.

**(A)**

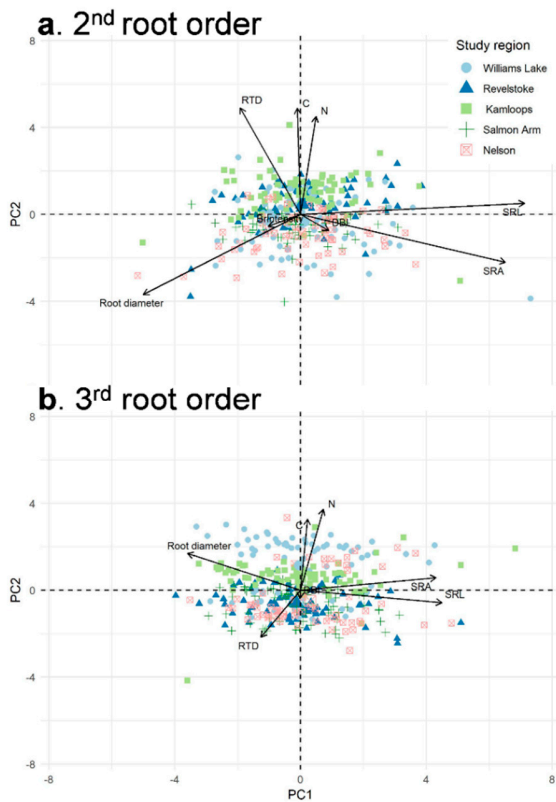

**(B)**

|                             | PC1 (30.33%) | PC2 (21.93%) | PC3 (15.10%) |
|-----------------------------|--------------|--------------|--------------|
| <b>1<sup>st</sup> order</b> |              |              |              |
| SRL                         | <b>0.94</b>  | 0.22         | -0.18        |
| RTD                         | -0.60        | 0.32         | <b>-0.66</b> |
| Root diameter               | -0.44        | -0.57        | <b>0.64</b>  |
| SRA                         | <b>0.95</b>  | -0.01        | 0.18         |
| DBI                         | 0.15         | -0.17        | -0.11        |
| Branching intensity         | -0.06        | -0.27        | -0.21        |
| Root N                      | -0.15        | <b>0.76</b>  | 0.33         |
| Root C                      | -0.17        | <b>0.78</b>  | 0.37         |
| <b>2<sup>nd</sup> order</b> | 29.10%       | 20.58%       | 17.09%       |
| SRL                         | <b>0.97</b>  | 0.07         | -0.10        |
| RTD                         | -0.26        | <b>0.67</b>  | -0.64        |
| Root diameter               | <b>-0.69</b> | -0.50        | 0.46         |
| SRA                         | <b>0.89</b>  | -0.30        | 0.24         |
| DBI                         | 0.12         | -0.10        | -0.22        |
| Branching intensity         | -0.14        | -0.08        | -0.15        |
| Root N                      | 0.06         | <b>0.62</b>  | 0.58         |
| Root C                      | -0.01        | <b>0.67</b>  | 0.52         |
| <b>3<sup>rd</sup> order</b> | 35.95%       | 22.03%       | 17.77%       |
| SRL                         | <b>0.97</b>  | -0.12        | 0.07         |
| RTD                         | -0.27        | -0.47        | <b>0.80</b>  |
| Root diameter               | <b>-0.78</b> | 0.37         | -0.43        |
| SRA                         | <b>0.93</b>  | 0.12         | -0.26        |
| DBI                         | 0.00         | -0.10        | -0.10        |
| Branching intensity         | <i>NA</i>    | <i>NA</i>    | <i>NA</i>    |
| Root N                      | <i>0.16</i>  | <b>0.81</b>  | 0.26         |
| Root C                      | 0.04         | <b>0.71</b>  | 0.51         |

**Figure S2** Distribution of branching intensity and dichotomous branching index values **(a)** across a biogeographic gradient and **(b)** variance partitioning of architectural traits at different hierarchically structured ecological scales (region, site, tree cluster and fine-root branch). WL, Williams Lake; R, Revelstoke; K, Kamloops; SA, Salmon Arm; N, Nelson. For (a), each data point represents one measurement for one root branch of interior Douglas-fir.  $N = 25$  except for N2 where  $N = 15$ . The sign '+' within the boxes represents the mean value for comparison with the median value (centre line).

**a.**

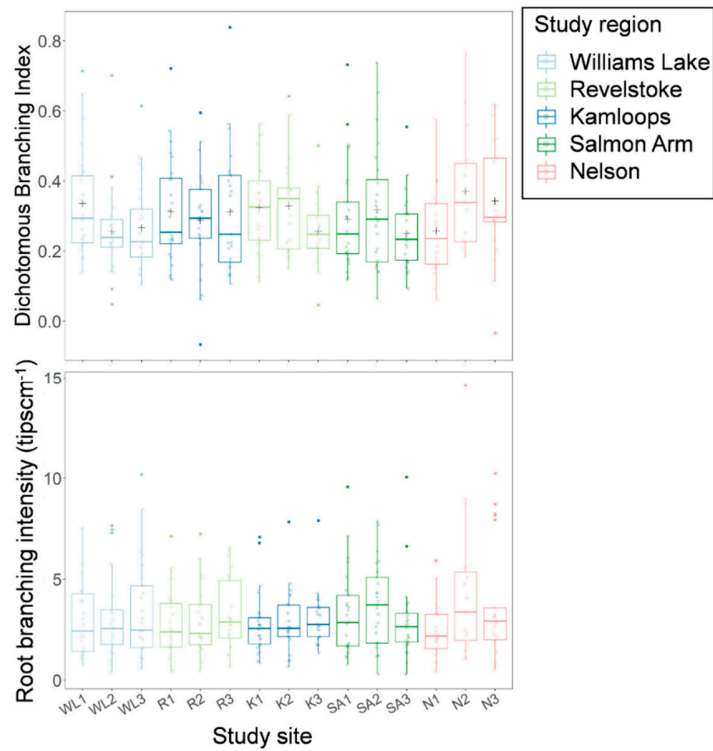

**b.**

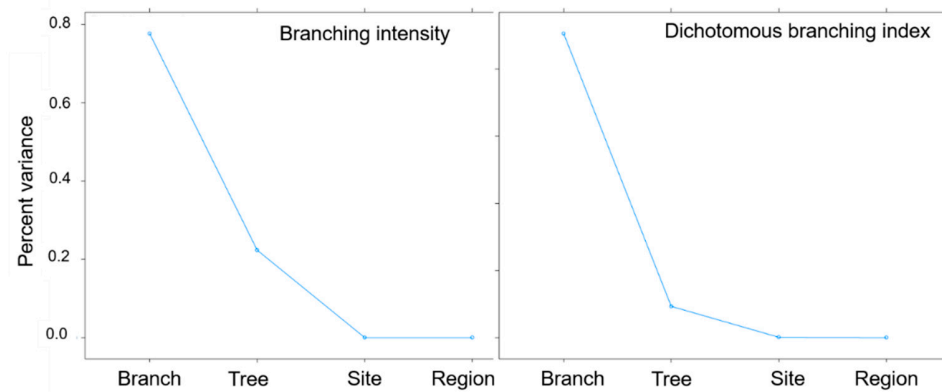

**Figure S3** Ordination plot of study regions (five in total) across a biogeographic gradient based on principal component analysis of climatic, edaphic and site variables. MAP, mean annual precipitation (mm); MAT, mean annual temperature (°C); CN, soil carbon-to-nitrogen ratio; BA, Basal area (m<sup>2</sup>ha<sup>-1</sup>); CEC, effective cation exchange capacity (cmol(+)kg<sup>-1</sup>); stand\_comp, stand tree species composition. Principal component 1 explained 45.03 % and Principal component 2 explained 20.82 % of the data variation.

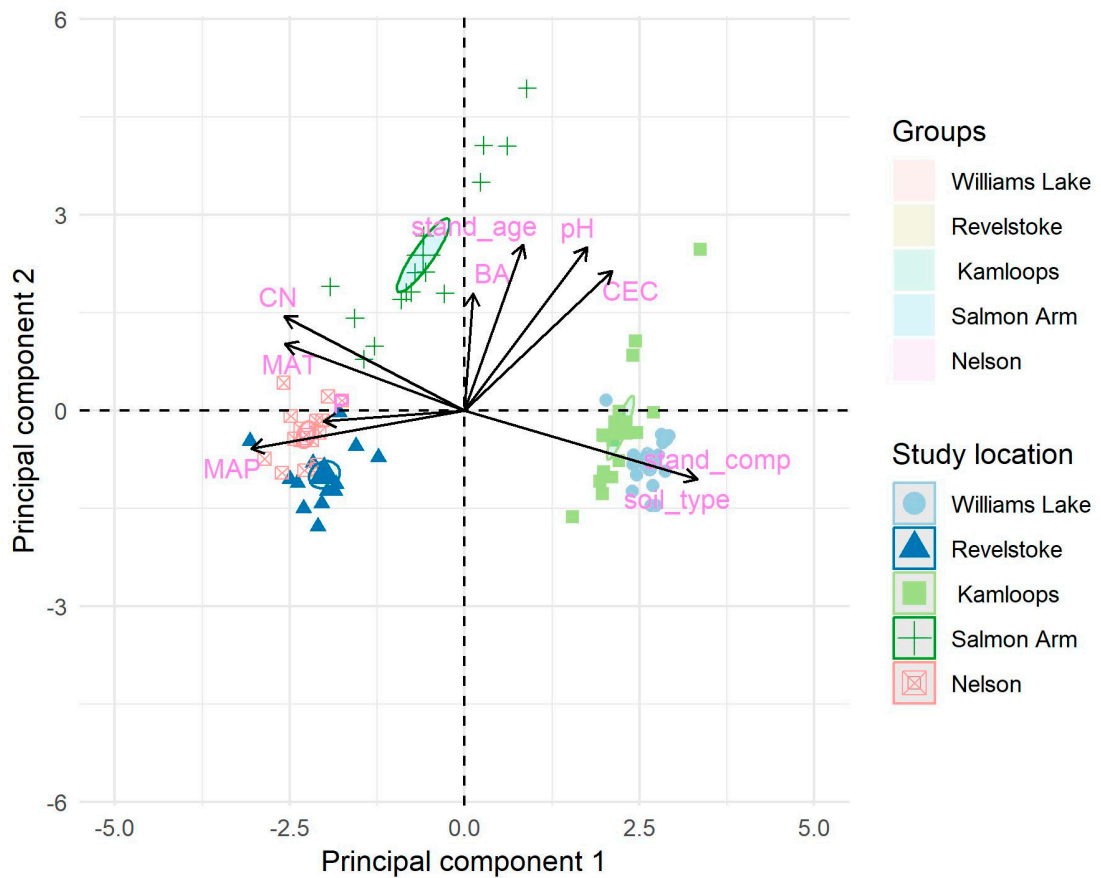

**Figure S4** Description of morphological attributes of fine roots for three coniferous tree species encountered in this study. Description of root periderm texture and colour, root branching pattern and root tips habit are accompanied by exemplary pictures of root periderm and fine-root branching pattern. We validated the key with molecular genetic analysis of interior Douglas-fir (*Pseudotsuga menziesii* var *glauca*) and western hemlock (*Tsuga heterophylla* (Raf.) Sarg.; most similar morphologically). Samples were sent to the Appalachian laboratory at the Centre for Environmental Science (University of Maryland) and the findings of BLASTing Chloroplast DNA sequences from the *rpl7* locus confirmed our expectations (accession numbers GQ999630.1, Douglas-fir and HQ846196.1, hemlock; Gugger et al., 2010). This figure was reproduced from Defrenne et al. (2019).

| tree species                | <i>Pseudotsuga menziesii</i> var. <i>glauca</i><br>Interior Douglas-fir                                                                                                               | <i>Tsuga heterophylla</i><br>Western hemlock                                                                                                                                                                                                                   | <i>Thuja plicata</i><br>Western redcedar                                                                                                                                                      |
|-----------------------------|---------------------------------------------------------------------------------------------------------------------------------------------------------------------------------------|----------------------------------------------------------------------------------------------------------------------------------------------------------------------------------------------------------------------------------------------------------------|-----------------------------------------------------------------------------------------------------------------------------------------------------------------------------------------------|
| Periderm texture and colour | Older periderm parts form longitudinal, sinuous furrows of dark-grey colour. Younger periderm is amber with some bright yellow strips. Inner layers are bright orange to pale yellow. | Older periderm is amber with very fine longitudinal dark brown stripes. Brittle, detaches in chunks. Old periderm on coarser roots is dark grey with reddish brown stripes. Young periderm is smooth, dark red and forms a thin layer. Inner layers are white. | Older periderm is brittle and scrapes off in slab. Forms fine furrows of amber colour. Young periderm forms bright red fine strips, brittle and smooth. Inner layers are ochre to pale beige. |
| Branching pattern           | Irregularly ramified branches, very tortuous. No clear difference in size among fine root orders.                                                                                     | Regularly ramified and straight lined structured. Tips are commonly grouped along root axis. Tips are shorter and finer (and redder) than higher order roots.                                                                                                  | Regularly ramified. straight lined structured, no difference in size among fine root orders. Large branching angle.                                                                           |
| Root tips                   | Forming ectomycorrhizas<br>Mostly thick, straight tips, pinnately tortuous tips with dichotomous branching.                                                                           | Forming ectomycorrhizas<br>Mostly irregular branched and tips are bent.                                                                                                                                                                                        | Forming arbuscular mycorrhizas<br>long straight tips.                                                                                                                                         |
|                             | 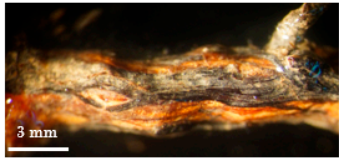<br>3 mm                                                                                           | <br>3 mm                                                                                                                                                                   | <br>3 mm                                                                                                 |
|                             | <br>5 mm                                                                                           | <br>60 mm                                                                                                                                                                  | <br>3 mm                                                                                                 |

**Table S1** Means and standard error (SE) of fine-root morphological, chemical and architectural traits of interior Douglas-fir across a biogeographic gradient made of five study locations

| Study location | Root order | N  | Morphological root traits |      |                                        |      |                           |       |                    |      | Chemical root traits |      |          |      |          |      | Architectural root traits |                                 |      |      |      |
|----------------|------------|----|---------------------------|------|----------------------------------------|------|---------------------------|-------|--------------------|------|----------------------|------|----------|------|----------|------|---------------------------|---------------------------------|------|------|------|
|                |            |    | SRL (mg <sup>-1</sup> )   |      | SRA (cm <sup>2</sup> g <sup>-1</sup> ) |      | RTD (mgcm <sup>-3</sup> ) |       | Root diameter (mm) |      | Root C %             |      | Root N % |      | Root C:N |      | N                         | BrIntensity (cm <sup>-1</sup> ) |      | DBI  |      |
|                |            |    | Mean                      | SE   | Mean                                   | SE   | Mean                      | SE    | Mean               | SE   | Mean                 | SE   | Mean     | SE   | Mean     | SE   |                           | Mean                            | SE   | Mean | SE   |
| Williams Lake  | 1          | 75 | 16.97                     | 0.43 | 213.60                                 | 4.21 | 470.50                    | 10.10 | 0.41               | 0.01 | 40.35                | 0.25 | 1.02     | 0.02 | 40.43    | 0.69 | 75                        | 3.15                            | 0.24 | 0.27 | 0.01 |
|                | 2          | 75 | 10.51                     | 0.37 | 172.20                                 | 4.05 | 449.00                    | 11.33 | 0.54               | 0.01 | 44.55                | 0.29 | 1.10     | 0.02 | 41.15    | 0.49 |                           |                                 |      |      |      |
|                | 3          | 75 | 3.75                      | 0.18 | 105.10                                 | 3.25 | 426.60                    | 9.41  | 0.93               | 0.02 | 49.02                | 0.16 | 1.03     | 0.02 | 48.28    | 0.73 |                           |                                 |      |      |      |
| Revelstoke     | 1          | 75 | 16.12                     | 0.46 | 200.70                                 | 3.63 | 505.80                    | 9.18  | 0.40               | 0.01 | 44.24                | 0.08 | 1.02     | 0.01 | 43.62    | 0.25 | 75                        | 2.99                            | 0.19 | 0.30 | 0.02 |
|                | 2          | 75 | 10.90                     | 0.41 | 164.30                                 | 3.32 | 505.40                    | 9.39  | 0.50               | 0.01 | 46.14                | 0.11 | 1.04     | 0.01 | 44.60    | 0.41 |                           |                                 |      |      |      |
|                | 3          | 75 | 4.00                      | 0.20 | 99.00                                  | 2.68 | 503.70                    | 8.27  | 0.84               | 0.02 | 48.34                | 0.12 | 0.81     | 0.01 | 60.08    | 0.53 |                           |                                 |      |      |      |
| Kamloops       | 1          | 75 | 15.51                     | 0.39 | 185.30                                 | 4.04 | 559.60                    | 12.95 | 0.39               | 0.00 | 42.54                | 0.23 | 1.25     | 0.01 | 34.23    | 0.27 | 75                        | 2.91                            | 0.17 | 0.30 | 0.01 |
|                | 2          | 75 | 10.53                     | 0.37 | 157.20                                 | 3.33 | 523.90                    | 10.70 | 0.49               | 0.01 | 45.91                | 0.17 | 1.22     | 0.01 | 37.86    | 0.48 |                           |                                 |      |      |      |
|                | 3          | 75 | 4.07                      | 0.22 | 99.71                                  | 3.60 | 494.50                    | 13.44 | 0.86               | 0.02 | 49.82                | 0.10 | 0.94     | 0.01 | 54.16    | 0.91 |                           |                                 |      |      |      |
| Salmon Arm     | 1          | 75 | 15.97                     | 0.38 | 197.30                                 | 3.68 | 529.30                    | 10.83 | 0.40               | 0.01 | 42.17                | 0.08 | 0.87     | 0.03 | 48.35    | 0.16 | 75                        | 3.32                            | 0.24 | 0.28 | 0.02 |
|                | 2          | 75 | 10.34                     | 0.30 | 161.40                                 | 3.29 | 513.30                    | 11.20 | 0.50               | 0.01 | 44.69                | 0.07 | 0.84     | 0.00 | 53.36    | 0.29 |                           |                                 |      |      |      |
|                | 3          | 75 | 4.06                      | 0.19 | 101.30                                 | 2.72 | 493.00                    | 9.58  | 0.84               | 0.02 | 48.00                | 0.10 | 0.80     | 0.01 | 60.28    | 0.52 |                           |                                 |      |      |      |
| Nelson         | 1          | 65 | 16.88                     | 0.57 | 203.00                                 | 4.51 | 513.30                    | 11.33 | 0.38               | 0.01 | 39.51                | 0.53 | 0.84     | 0.03 | 48.89    | 0.94 | 65                        | 3.39                            | 0.33 | 0.32 | 0.02 |
|                | 2          | 65 | 10.91                     | 0.43 | 165.50                                 | 3.74 | 495.50                    | 9.08  | 0.51               | 0.01 | 43.93                | 0.16 | 0.81     | 0.01 | 54.14    | 0.38 |                           |                                 |      |      |      |
|                | 3          | 65 | 4.37                      | 0.21 | 113.10                                 | 3.82 | 445.00                    | 10.58 | 0.85               | 0.02 | 47.49                | 0.20 | 0.86     | 0.01 | 55.53    | 0.57 |                           |                                 |      |      |      |

N, sample size; SRL, Specific root length; SRA, Specific root area; RTD, Root tissues density; Root C:N, Root carbon-to-nitrogen ratio; BrIntensity, Branching intensity (calculated as the number of first- order root/ length of second- order root); DBI, Dichotomous branching index, values closer to 0 indicate a dichotomous branching pattern and values closer to 1, a herringbone branching pattern, see Beidler et al. (2015).

**Table S2** Spearman's correlation coefficient for pairwise root order (first three root orders) relationships

| 1st order           | SRL          | RTD          | Root diameter | SRA         | DBI   | Branching intensity | Root N      |
|---------------------|--------------|--------------|---------------|-------------|-------|---------------------|-------------|
| RTD                 | <b>-0.26</b> |              |               |             |       |                     |             |
| Root diameter       | <b>-0.67</b> | <b>-0.46</b> |               |             |       |                     |             |
| SRA                 | <b>0.83</b>  | <b>-0.73</b> | <b>-0.20</b>  |             |       |                     |             |
| DBI                 | 0.05         | -0.08        | 0.00          | 0.09        |       |                     |             |
| Branching intensity | 0.09         | 0.04         | -0.11         | 0.04        | -0.03 |                     |             |
| Root N              | -0.01        | 0.08         | -0.06         | -0.04       | -0.04 | 0.01                |             |
| Root C              | -0.02        | 0.07         | -0.05         | -0.03       | -0.09 | 0.01                | <b>0.40</b> |
| <hr/>               |              |              |               |             |       |                     |             |
| 2nd order           |              |              |               |             |       |                     |             |
| RTD                 | -0.07        |              |               |             |       |                     |             |
| Root diameter       | <b>-0.81</b> | <b>-0.46</b> |               |             |       |                     |             |
| SRA                 | <b>0.86</b>  | <b>-0.51</b> | <b>-0.44</b>  |             |       |                     |             |
| DBI                 | 0.07         | -0.01        | -0.06         | 0.07        |       |                     |             |
| Branching intensity | 0.10         | -0.04        | -0.10         | 0.10        | -0.03 |                     |             |
| Root N              | 0.02         | 0.00         | -0.01         | 0.02        | -0.02 | 0.00                |             |
| Root C              | 0.02         | 0.06         | -0.09         | -0.02       | -0.06 | 0.03                | <b>0.44</b> |
| <hr/>               |              |              |               |             |       |                     |             |
| 3rd order           |              |              |               |             |       |                     |             |
| RTD                 | <b>-0.17</b> |              |               |             |       |                     |             |
| Root diameter       | <b>-0.88</b> | <b>-0.23</b> |               |             |       |                     |             |
| SRA                 | <b>0.92</b>  | <b>-0.48</b> | <b>-0.67</b>  |             |       |                     |             |
| DBI                 | -0.03        | 0.02         | 0.02          | -0.03       |       |                     |             |
| Branching intensity | NA           | NA           | NA            | NA          | NA    | NA                  |             |
| Root N              | 0.10         | -0.27        | 0             | <b>0.17</b> | 0.00  | NA                  |             |
| Root C              | 0.01         | -0.01        | 0             | 0.02        | -0.02 | NA                  | <b>0.46</b> |

SRL, Specific root length; RTD, Root tissues density; SRA, specific root area; DBI, Dichotomous branching index, values closer to 0 indicate a dichotomous branching pattern and values closer to 1, a herringbone branching pattern, see Beidler et al. (2015); Branching intensity (the number of first- order root/ length of second- order root), this was not assessed for third-order roots; Root C, Root carbon concentration (%); Root N, Root nitrogen concentration (%). Bold values indicate statistically significant correlation at  $P < 0.05$ . NA, not applicable.

**Table S3.** Stand properties of the 15 study sites selected across a biogeographic gradient in Western Canada.

| Study region  | Stand within region | Stand properties                                  |                                                               |                      |                     |            |                    |
|---------------|---------------------|---------------------------------------------------|---------------------------------------------------------------|----------------------|---------------------|------------|--------------------|
|               |                     | Dominant tree species                             | Basal area m <sup>2</sup> ha <sup>-1</sup><br>(% Douglas-fir) | Stand Age<br>(years) | Soil type (texture) | Humus type | rooting depth (cm) |
| Williams Lake | WL1                 | <i>Pseudotsuga menziesii</i>                      | 22.1 (98%)                                                    | 125                  | luvisol (C)         | mor        | 58                 |
|               | WL2                 | <i>Pseudotsuga menziesii</i>                      | 15.3 (96%)                                                    | 141                  | luvisol (SiCL)      | mull       | 34                 |
|               | WL3                 | <i>Pinus contorta</i>                             | 18.5 (97%)                                                    | 106                  | luvisol (SiCL)      | mull       | 37                 |
| Revelstoke    | R1                  | <i>Pseudotsuga menziesii</i>                      | 60.6 (66%)                                                    | 106                  | brunisol (SiCL)     | mor        | 45                 |
|               | R2                  | <i>Tsuga heterophylla</i>                         | 38.4 (66%)                                                    | 83                   | brunisol (L)        | moder      | 50                 |
|               | R3                  | <i>Thuja plicata</i>                              | 47.9 (72%)                                                    | 104                  | brunisol (L)        | moder      | 50                 |
| Kamloops      | K1                  |                                                   | 56.4 (100%)                                                   | 126                  | luvisol (SiC)       | moder      | 40                 |
|               | K2                  | <i>Pseudotsuga menziesii</i>                      | 37.6 (100%)                                                   | 94                   | luvisol (L)         | moder      | 40                 |
|               | K3                  |                                                   | 48.3 (100%)                                                   | 104                  | luvisol (L)         | moder      | 30                 |
| Salmon Arm    | SA1                 | <i>Pseudotsuga menziesii</i>                      | 98.5 (50%)                                                    | 142.5                | brunisol (SiL)      | mull       | 80                 |
|               | SA2                 | <i>Larix occidentalis</i>                         | 81.8 (58%)                                                    | 140                  | brunisol (L)        | mor        | 76                 |
|               | SA3                 | <i>Tsuga heterophylla</i><br><i>Thuja plicata</i> | 80.6 (39%)                                                    | 147                  | brunisol (L)        | mull       | 40                 |
| Nelson        | N1                  | <i>Pseudotsuga menziesii</i>                      | 49.8 (65%)                                                    | 115                  | brunisol (SL)       | mor        | 60                 |
|               | N2                  | <i>Larix occidentalis</i>                         | 65.4 (29%)                                                    | 100                  | brunisol (SL)       | moder      | 37                 |
|               | N3                  | <i>Tsuga heterophylla</i><br><i>Thuja plicata</i> | 56.0 (55%)                                                    | 104                  | brunisol (SL)       | moder      | 49                 |

The soil texture was assessed on the first B horizon. L, loam; SiC, silty clay; SiCL, silty clay loam; SiL, silt loam; SL, sandy loam. This table was reproduced from Defrenne et al. (2019).

## References

- Beidler, K.V.; Taylor, B.N.; Strand, A.E.; Cooper, E.R.; Schönholz, M.; Pritchard, S.G. Changes in root architecture under elevated concentrations of CO<sub>2</sub> and nitrogen reflect alternate soil exploration strategies. *New Phytologist* 2015, 205, 1153–1163.
- Defrenne, C.E.; Philpott, T.J.; Guichon, S.H.A.; Roach, W.J.; Pickles, B.J.; Simard, S.W. Shifts in ectomycorrhizal fungal communities and exploration types relate to the environment and fine-root traits across interior Douglas-fir forests of western Canada. *Front. Plant Sci.* 2019, 10.
- Gugger, P.F.; Sugita, S.; Cavender-Bares, J. Phylogeography of Douglas-fir based on mitochondrial and chloroplast DNA sequences: testing hypotheses from the fossil record. *Molecular Ecology* 2010, 19, 1877–1897.
